# Supplementary material for: Phages against Noncapsulated Klebsiella pneumoniae: Broader Host range, Slower Resistance
Source: PubMed Central journal article supplement (PMC10433977; doi:10.1128/spectrum.04812-22), 2023-06-20
Supplement: spectrum.04812-22-s0001.pdf [file spectrum.04812-22-s0001.pdf]

1 **Supplementary Material**

2

3 **Phages against non-capsulated *Klebsiella pneumoniae*: broader host range, slower**  
4 **resistance**

5

6 **Authors**

7 Marta Lourenço<sup>1</sup>, Lisa Osbelt<sup>2</sup>, Virginie Passet<sup>1</sup>, François Gravey<sup>3</sup>, Daniela Megrian<sup>4</sup>, Till Strowig<sup>2</sup>,  
8 Carla Rodrigues<sup>1</sup>, Sylvain Brisse<sup>1</sup>

9

10 1 Institut Pasteur, Université Paris Cité, Biodiversity and Epidemiology of Bacterial Pathogens,  
11 Paris, France

12 2 Department of Microbial Immune Regulation, Helmholtz Center for Infection Research,  
13 Braunschweig, Germany; ESF International Graduate School on Analysis, Imaging and Modelling  
14 of Neuronal and Inflammatory Processes, Otto-Von-Guericke University, Magdeburg, Germany.

15 3 Dynamycure Inserm UM1311 Normandie Univ, UNICAEN, UNIROUEN, 14000 Caen, France

16 4 Unité de Microbiologie Structurale, Institut Pasteur, CNRS UMR 3528, Université Paris Cité, F-  
17 75015, Paris, France

18

19 **Supporting information**

20 **Supplementary text 1** - Strain selection for phage isolation

21 **Supplementary text 2**- Anti-K phage cp48 and anti-K<sup>d</sup> phage mtp6 may share the same receptor

22

23 **Supplementary tables:**

24 **Table S1.** Dataset of 7,388 public *K. pneumoniae* species complex genomes

25 **Table S2.** Collection of bacterial strains used in this study

26 **Table S3.** Main characteristics of the phages isolated in this study

27 **Table S4.** Depolymerase analysis

28 **Table S5.** Percentage of resistant clones *in vitro*

29 **Table S6.** Analysis of the mutations acquired after phage infection *in vitro* (Breseq analysis)

30 **Table S7.** Statistics - 1 day phage treatment

31 **Table S8.** Statistics - 3 days phage treatment

32 **Table S9.** *In vivo* resistance phenotypes

33 **Table S10.** Analysis of the mutations acquired after phage infection *in vivo* (Breseq analysis)

34 **Table S11.** Lysis Kinetics data relative to cocktails including mtp5 and anti-K phages

35 *Please see the separate Excel file for access to the supplementary tables.*

36

37 **Supplementary figures:**

38 **Figure S1.** Frequency of *Klebsiella pneumoniae* genomes broken down by ST, KL or OL characteristics.

39 **Figure S2.** Host range of anti-K phages.

40 **Figure S3.** Lysis kinetics of phage mtp5 on the 7 capsule-deficient mutant ( $\Delta wza$  or  $\Delta wcaJ$ ) strains.

41 **Figure S4.** Anti-Kd phages mtp5 and mtp7 genomic similarities with closest anti-Klebsiella phages.

42 **Figure S5.** Example of titration of phage mtp5 on the generated spontaneous non-mucoid clones.

43 **Figure S6.** Cocktails of phages mtp4, mtp6 and mtp7 with anti-capsule phages.

44 **Figure S7.** Subpopulations of bacteria non-susceptible to phages emerge slowly when using anti-K<sup>d</sup>  
45 phages against non-capsulated strains.

46 **Figure S8.** Resistance to anti-K phages leads to smaller (presumably less capsulated) colonies.

47 **Figure S9.** Mutations observed in populations exposed to phage cocktails that combine anti-K phages  
48 and anti-K<sup>d</sup> phages mtp4, mtp6 and mtp7.

49 **Figure S10.** Phage mtp5 does not infect wild-type strain BJ1GA *in vitro* but does *in vivo*.

50 **Figure S11.** Isolation of different phenotypes from the feces of mice during phage treatment.

51 **Figure S12.** Example of non-mucoid sectors.

52 **Figure S13.** Comparison of phages mtp6 and cp48 for their genomic and proteic structures and  
53 infection phenotype.

54

55

56 **Supplementary text 1:**

57

58 **Strain selection for phage isolation**

59 Based on our population genomics analysis (**Figure S1**), we first selected 7 *K. pneumoniae*  
60 strains as hosts for anti-capsulated strain phage isolation:

- 61 - *K. pneumoniae* NJST258\_2 (SB4975), a representative of the ST258-KL107 group, one of the  
62 most widespread lineages in clinical settings and linked to nosocomial infections and  
63 outbreaks<sup>1</sup>
- 64 - *K. pneumoniae* NCTC8172 (SB504), a ST505 harbouring the *cps* locus (KL) structure type 64,  
65 one of the most disseminated KL-types, which has been extensively associated with two  
66 widespread carbapenemase-producing sequence types (ST), ST147 and ST11<sup>2,3</sup>.
- 67 - strains SB5442 and SB5521, representing two successful MDR ST-KL (KL: capsule locus)  
68 combinations in clinical settings, ST101-KL106 and ST307-KL102, respectively<sup>4,5</sup>.
- 69 - *K. pneumoniae* strain CIP52.214 (SB3245), a ST297-KL10, was selected as it represented one of  
70 the most prevalent KL-types.
- 71 - two hypervirulent *K. pneumoniae* strains, SB3341 (ST66-KL2) and NTUH\_K2044 (SB3928; ST23-  
72 KL1), representing K1 and K2 capsule types, which are associated with severe invasive  
73 infections<sup>6,7</sup>. ST23 is the most frequent sublineage isolated in community-acquired liver  
74 abscesses, which is a prevalent infection in Asian countries<sup>6,8,9</sup>.

75 We next selected seven capsule-deficient strains to be used for anti-K<sup>d</sup> phage isolation. These  
76 included 6 *K. pneumoniae* and 1 *K. variicola* subsp. *variicola* (Kp3): Kp1 SB20Δ*wza* ST15/O1v1 (04A025),  
77 Kp1 SB3928Δ*wza* ST23/O1v2 (NTUH\_K2044), Kp1 SB4021Δ*wcaJ* (SA1) and SB4454Δ*wcaJ* (CG43)  
78 ST86/O1v1; Kp1 SB4496Δ*wza* ST380/O1v1 (BJ1-GA), Kp1 SB4975Δ*wza* ST258/O2v2 (NJST258\_2) and  
79 Kp3 SB579Δ*wza* ST146-O3/O3a (342)<sup>10</sup>. Together, the O types of these strains represented 50.7% of  
80 non-redundant strains in the genomic database.

81

82 **Supplementary text 2:**

83 **Small changes on phage genomes can lead to important host range differences**

84 The anti-K phage cp48 and anti-K<sup>d</sup> phage mtp6, turned out to have high sequence similarity (ANI:  
85 99.8%) despite their different infection phenotypes (capsulated vs non-capsulated) and very different  
86 host-ranges (**Figure S13**). Sequence differences were detected in 3 different regions. Some SNPs were  
87 detected on two specific proteins and one 77 bp insertion was detected on an HNH endonuclease  
88 Gp2.8/Gp7.7 gene of phage cp48, disrupting the protein (proteins 43/44). HNH endonucleases have  
89 been shown to be associated with the terminases of a large number of diverse phages <sup>11</sup>.

90 In order to explore the role of these differences on the phage protein structures, we performed a  
91 structural analysis of the altered proteins using AlphaFold. The SNP detected on protein 2 of phage  
92 cp48 leads to an aspartic acid at position 261, while protein 62 of mtp6 contains an asparagine. This  
93 variant is not expected to lead to structural or functional differences on the protein as the amino-acids  
94 have similar properties. Comparative analysis with the NCBI protein database showed high similarity  
95 of the mtp6 CDS 62/cp48 CDS 2 to another phage particle-associated lyase. Despite no structural  
96 differences are observed, phage lyases are known to degrade specific membrane polysaccharides,  
97 which in this case may be the cause on the differential infection affinity observed towards the  
98 capsulated and non-capsulated strains. Further in-dept characterization of these proteins needs to be  
99 performed in the future.

100 In addition, a group of SNPs leads to a 7 amino-acids variation when comparing proteins 47 of cp48  
101 and protein 18 of mtp6. This variation leads to important modifications on an exposed region of the  
102 proteins that could have functional implications: a highly positively charged loop in protein 47 of cp48  
103 is replaced by a bulky hydrophobic loop in protein 18 of mtp6, with very different physico-chemical  
104 properties (Figure S13C). It is possible that these variations could play a role in the phenotypic  
105 differences between the two phages. However, we could not attribute a function to this protein  
106 (comparison by blastp with the NCBI database showed this protein to be closely related to other  
107 hypothetical proteins).

108 Resistance to the cocktail of cp48 and mtp6 phages was conferred by an interruption of the wcaJ  
109 gene by an IS5 (**Figure S12**), as previously observed when this strain and its capsule-deficient mutant  
110 were separately infected with cp48 and mtp6, respectively.

111 **Supplementary figures:**

112

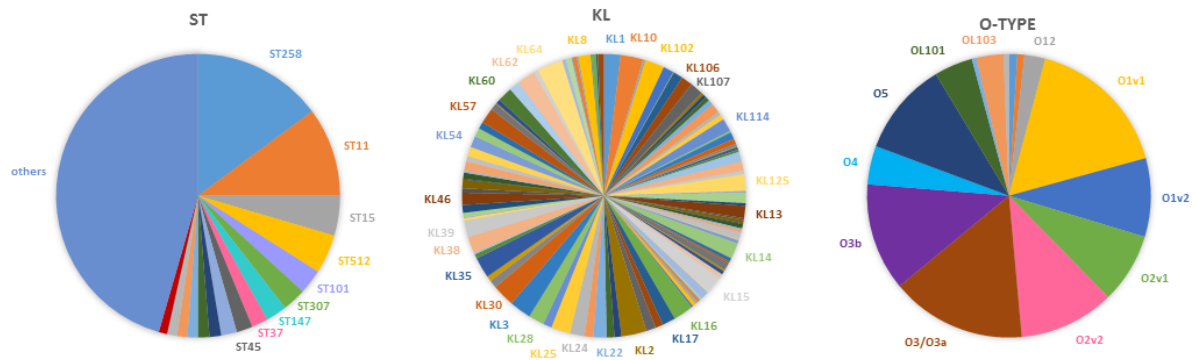

113

114 **Figure S1.** Frequency of *Klebsiella pneumoniae* genomes breakdown by ST, KL or OL characteristics.

115 The ST distribution analysis was performed based on a dataset of 7388 genomes. To eliminate bias  
116 due to recent clonal expansions or outbreaks, KL- and O-antigen types frequencies were calculated  
117 using a non-redundant dataset of 1193 genomes, in which only one random strain per ST was included.

118 Based on the MLST, the seven most prevalent allelic profiles present in the dataset (7,388 genomes)  
119 were ST258, ST11, ST15, ST512, ST101, ST307 and ST147. Analysis of the subset showed KL64, KL2,  
120 KL10, KL30, KL3, KL35, KL16 and KL102 to be the most prevalent capsular types, and the most frequent  
121 O-antigen types were O1v1, O3/O3a, O3b, O5 and O2v2.

122

123

124

125

126

127

128

129

130

131

132

133

134

135

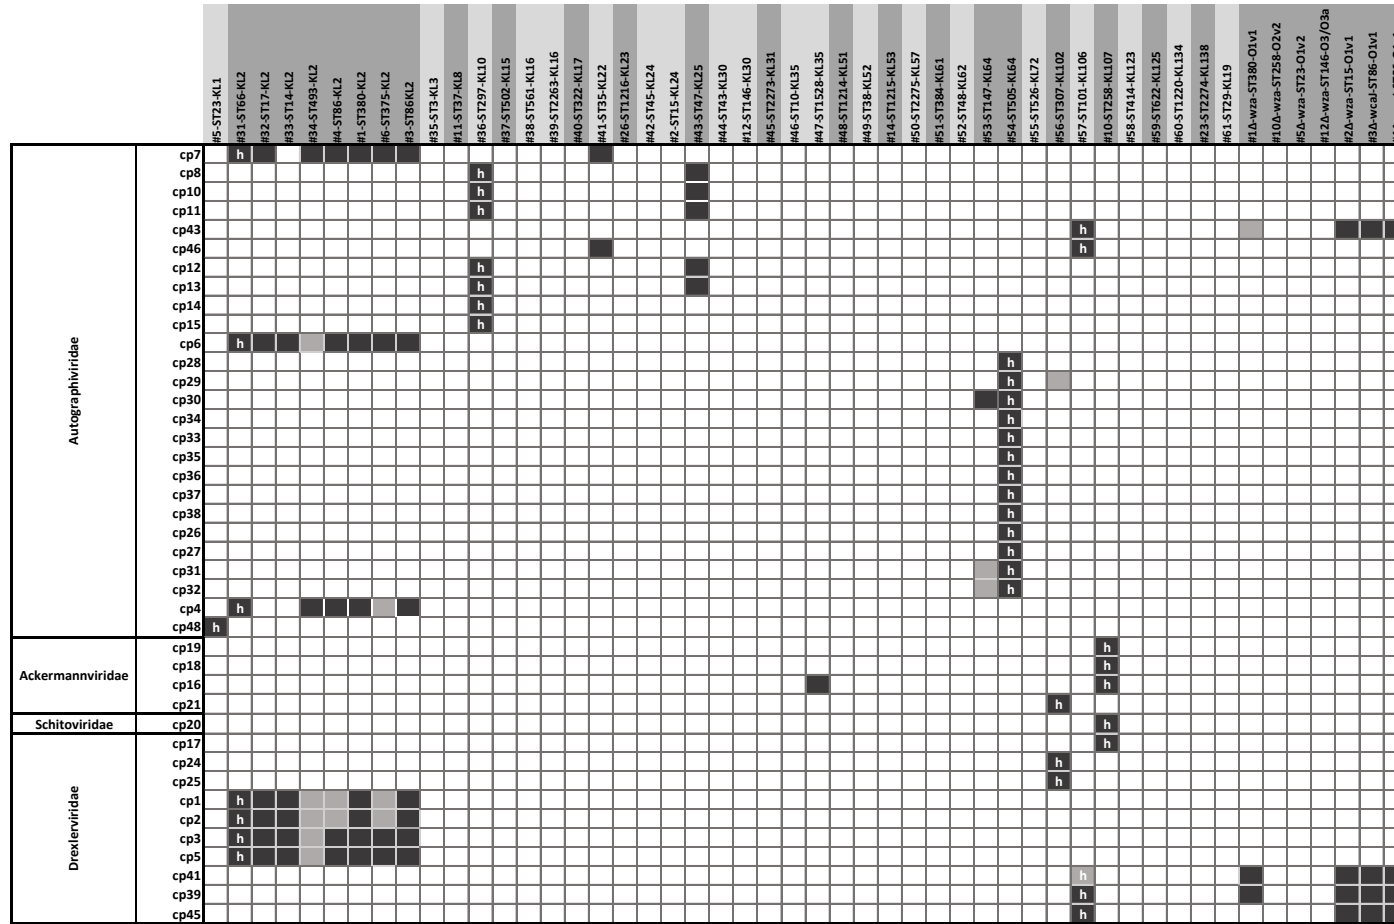

136

**Figure S2.** Host range of anti-K phages.

137

Anti-K phages were tested against wild-type strains and the 7 capsule-deficient ( $\Delta wza$  or  $\Delta wca$ ) mutants. The dark-filled cells represent complete lysis, light-

138

grey cells represent intermediate lysis and empty cells represent absence of lysis. "h" indicates the strain used as host for phage isolation.



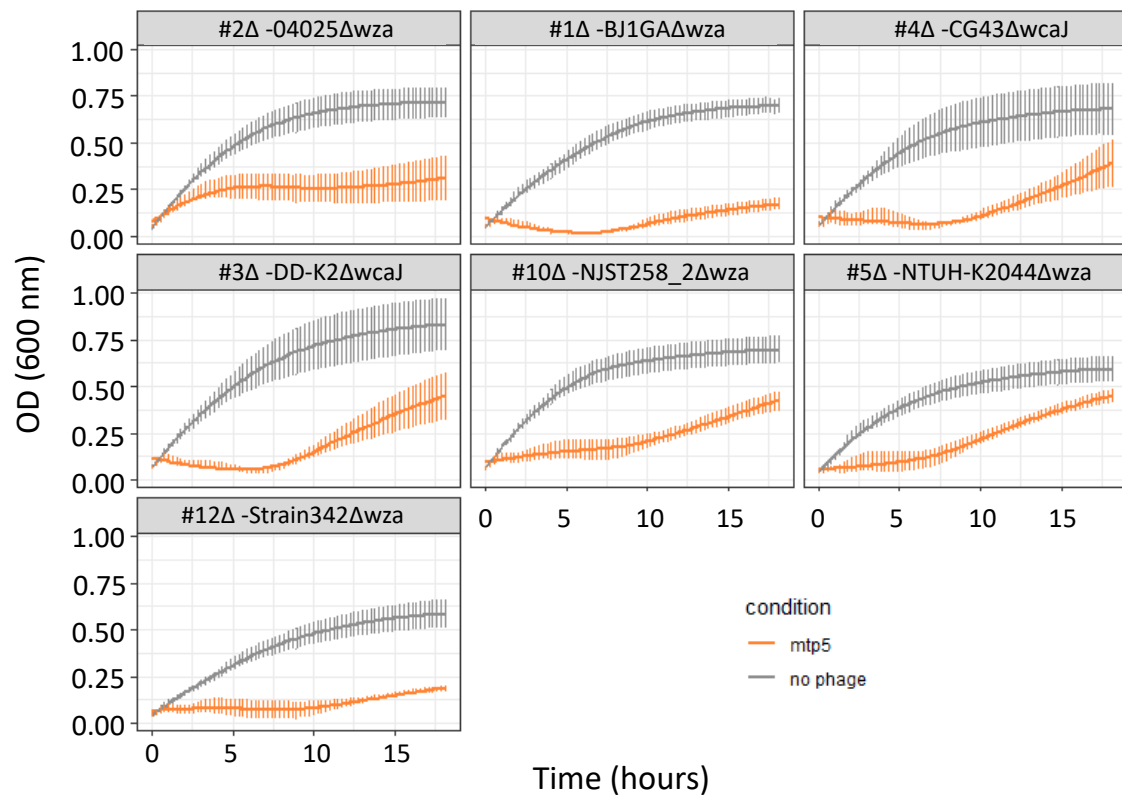

140

141

142

143 **Figure S3.** Lysis kinetics of phage mtp5 on the 7 capsule-deficient mutant ( $\Delta wza$  or  $\Delta wcaJ$ ) strains.

144 Growth curves of the seven capsule-deficient *K. pneumoniae* strains were calculated using three or

145 more replicates for each condition; error bars represent standard error of the mean (SEM) measured

146 by OD at 600 nm in liquid broth in the absence (grey) or presence (orange) of phage mtp5. At  $t = 0$ ,

147 the multiplicity of infection (MOI) was  $10^2$ . X-axis: time in minutes.

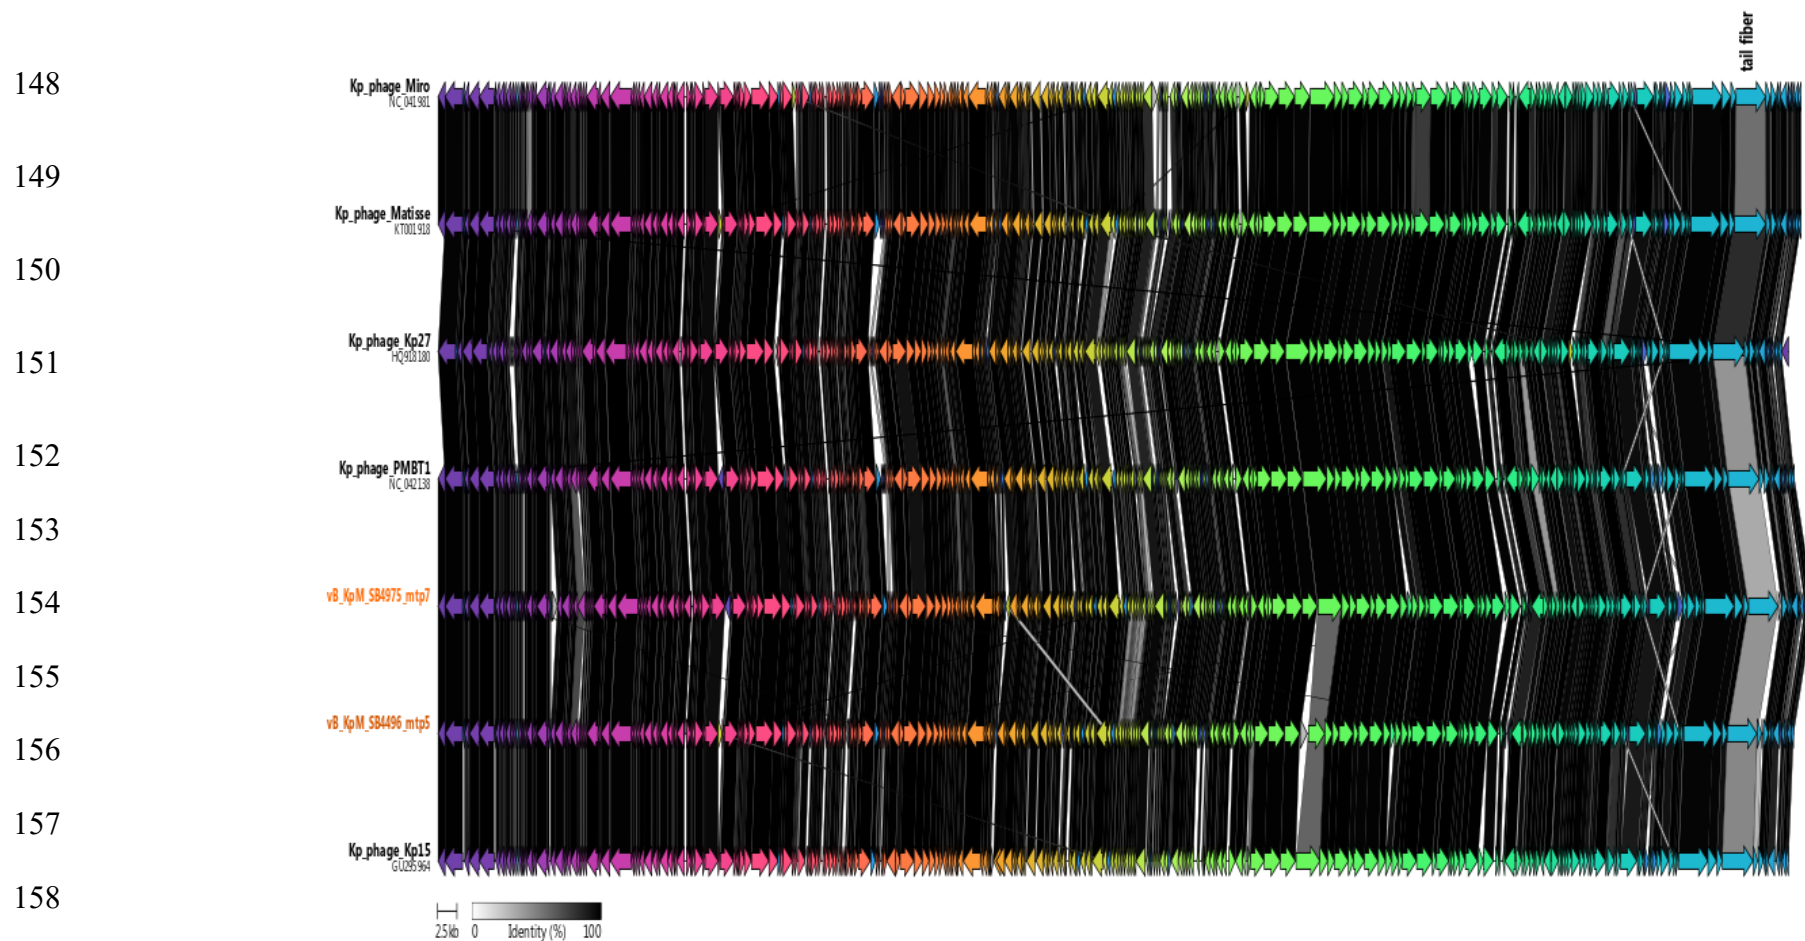

159 **Figure S4.** Anti-K<sup>d</sup> phages mtp5 and mtp7 genomic similarities with closest anti-Klebsiella phages.

160 Phages Kp15, Kp27, Matisse, Miro and PMBT1 were identified based on BLASTN as the most similar to phages mtp5 and mtp7. Phages genomes were aligned  
 161 using clinker. CDSs were arbitrarily colored. The white-to-dark grey blocks between CDSs represent their degree of aminoacid identity (see color scale at the  
 162 bottom).

163

164

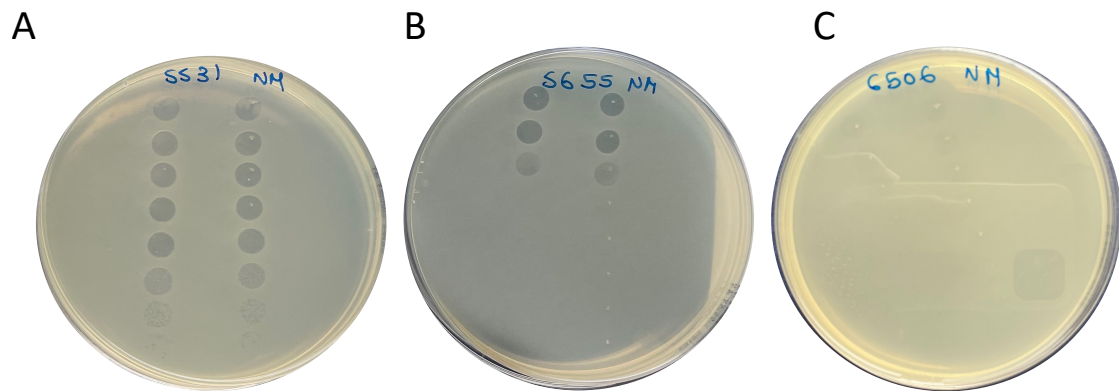

165

166

167 **Figure S5.** Example of titration of phage mtp5 on the generated spontaneous non-mucoid clones.

168 When titration was performed on NM strains, we could observe, different infectivity phenotypes.

169 Exponential liquid culture of NM clones was inoculated into a plate and mtp5 phage dilutions were

170 spotted (4ul). A) titration on high-affinity strain, B) titration on strain with low affinity and C) no

171 infection.

172

173

174

175

176

177

178

179

180

181

182

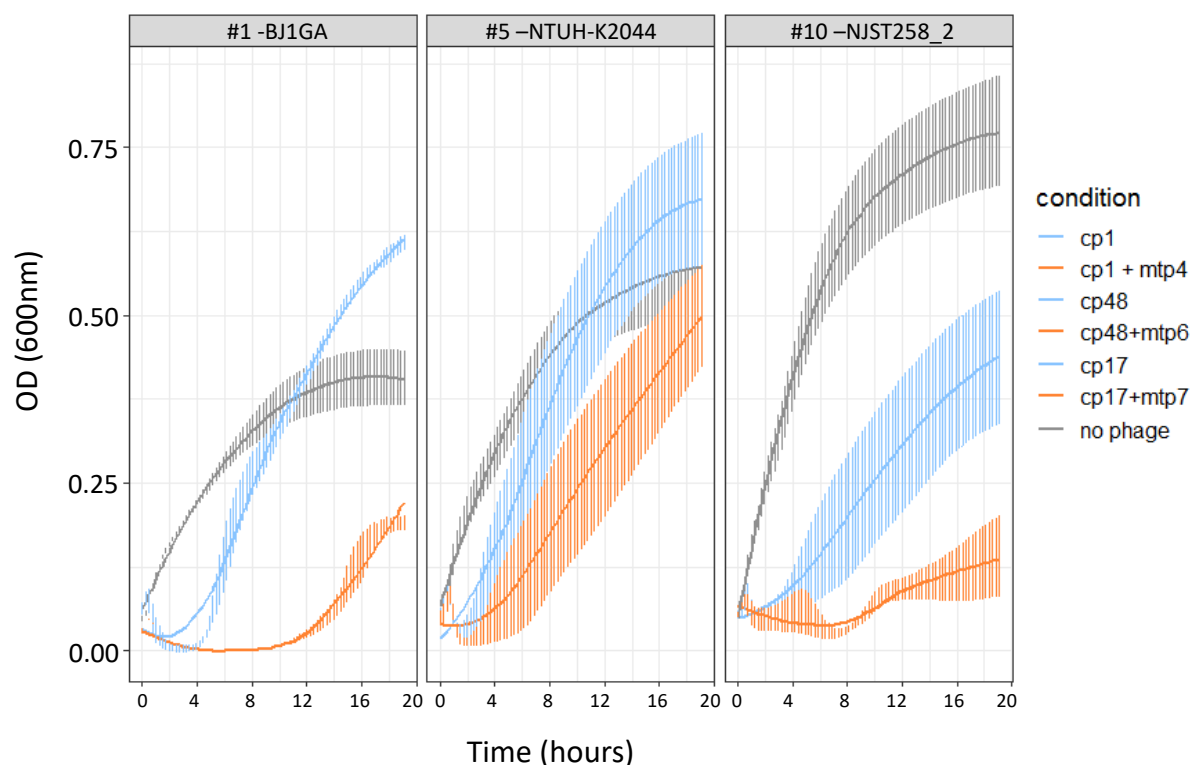

183

184 **Figure S6.** Cocktails of phages mtp4, mtp6 and mtp7 with anti-capsule phages

185 Growth curves for 3 different *K. pneumoniae* strains were obtained using three or more replicates for

186 each condition; error bars represent standard error of the mean (SEM) measured via OD600 nm

187 reading in liquid broth in the presence of three different phage cocktails. Cocktails containing anti-K

188 phage and anti-K<sup>d</sup> phages are in orange, whereas the use of anti-K phage alone is depicted in blue

189 (grey: control without phage). Left, anti-K phage cp1 and anti-K<sup>d</sup> phage mtp4 used against strain BJ1-

190 GA; Center: anti-K phage cp48 and anti-K<sup>d</sup> phage mtp6 used against strain NTUH-K2044; Right: anti-K

191 phage cp17 and anti-K<sup>d</sup> phage mtp7 tested against NJ-ST258-2.

192

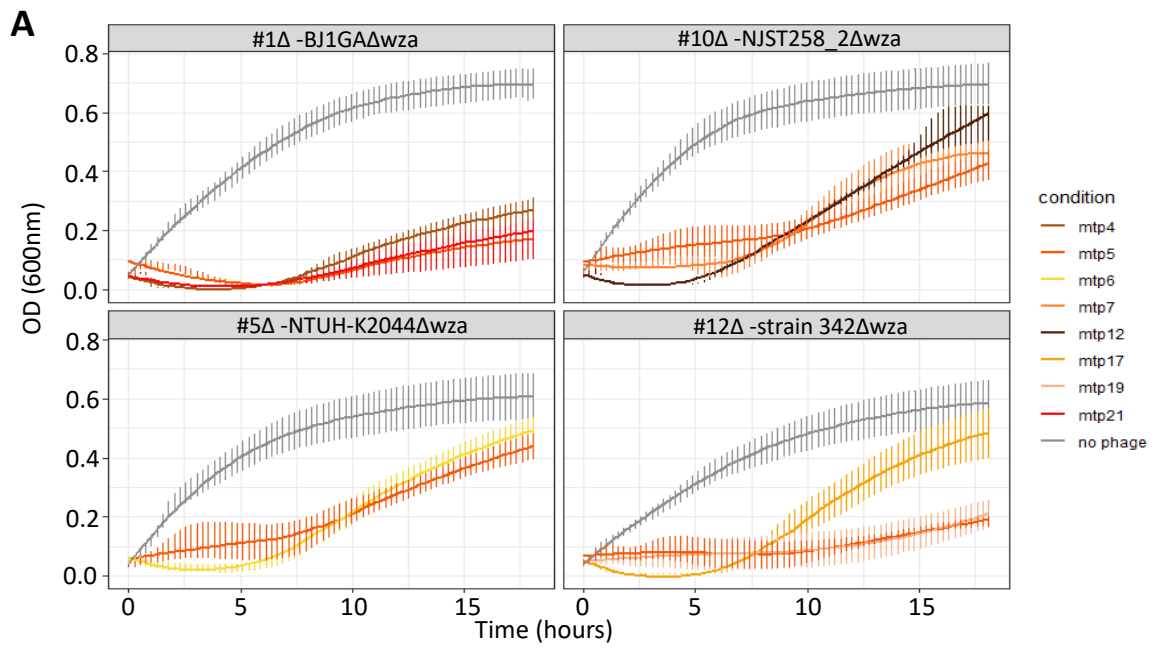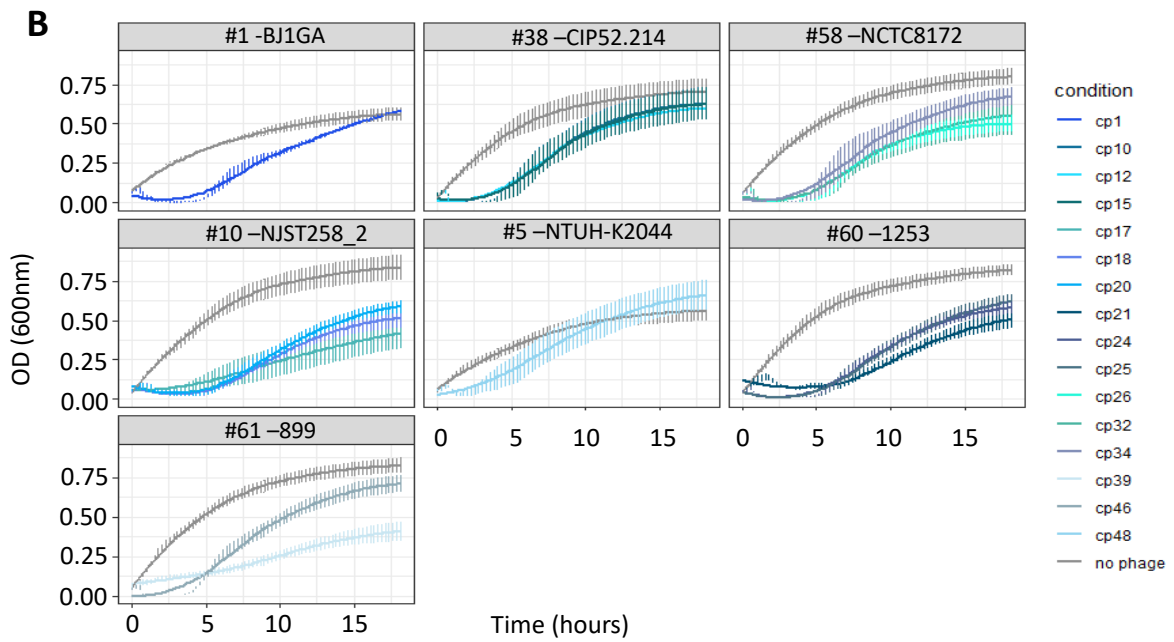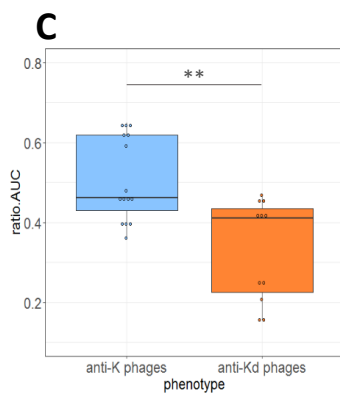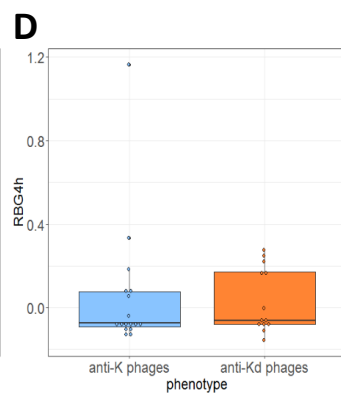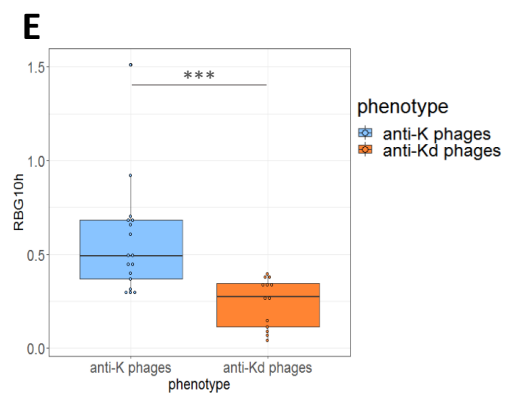

194 **Figure S7.** Subpopulations of bacteria that are non-susceptible to phages emerge slowly when using  
195 anti-K<sup>d</sup> phages against non-capsulated strains

196 **A and B.** Growth curves obtained using three Kp strains with or without capsule. Three or more  
197 replicates were used for each condition; error bars represent standard error of the mean (SEM) based  
198 on OD600 nm reading in liquid broth in the absence (grey) or presence of: **A.** anti-K<sup>d</sup> phages (orange  
199 tones) and **B.** anti-K phages (blue tones). At t = 0, multiplicity of infection (MOI) was 10<sup>2</sup>. In panels C, D  
200 and E, boxplots correspond to: **C.** Area under the curve (AUC); **D.** Relative bacterial growth (RBG) at  
201 4h; and **E.** RBG at 10h, after the initiation of regrowth, on cultures targeted by anti-K phages vs anti-K<sup>d</sup>  
202 phages (\*\*P-value ≤ 0.01; \*\*\*P-value ≤ 0.001, Mann-Whitney test).

203

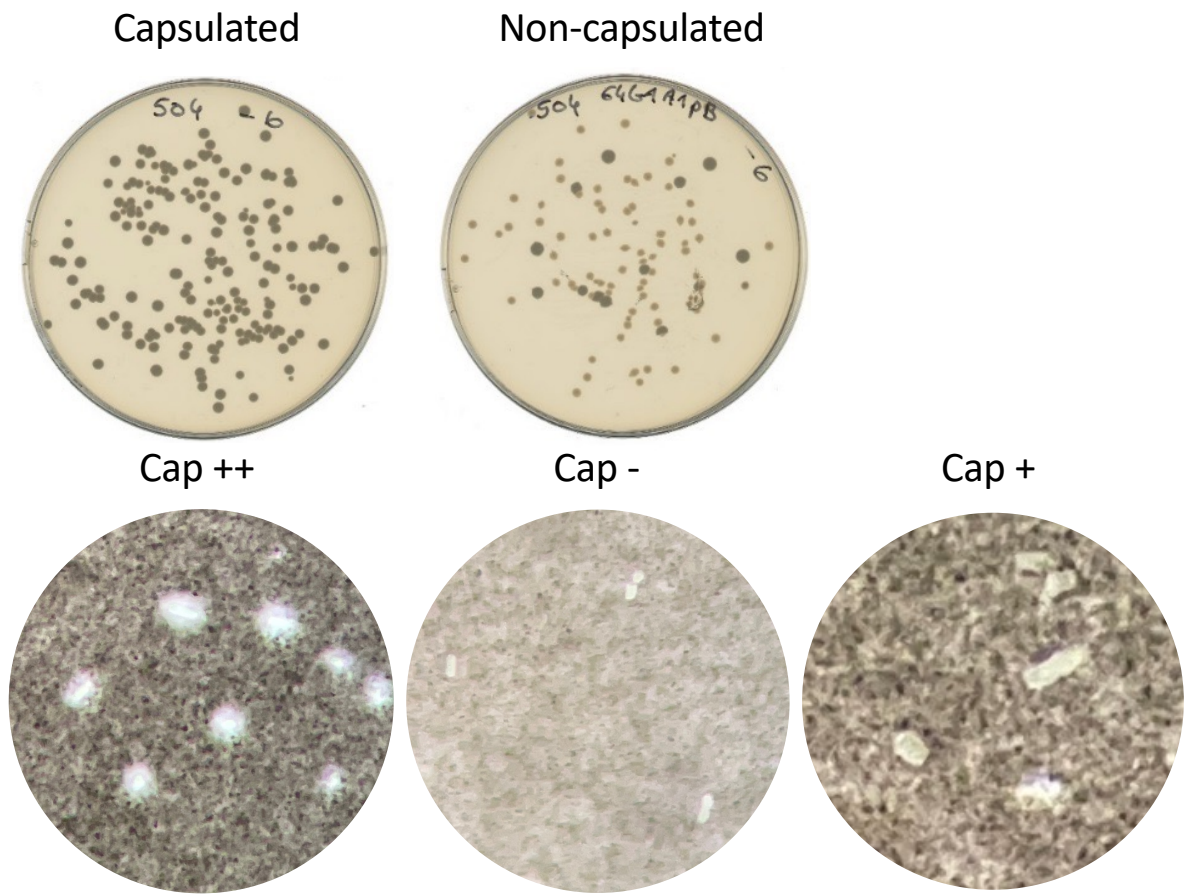

204

205 **Figure S8.** Resistance to anti-K phages leads to smaller (non-capsulated) colonies, contrasting with  
 206 capsulated wt colonies.

207 Example of appearance of non-capsulated colonies after anti-K phage use against capsulated strains.

208 Here, culture of K64 strain NCTC8172, comparing the initial and the derived population, which was

209 non-susceptible to phage cp34. Capsule staining was also performed showing abundant presence of

210 capsule on the “large” colonies, “medium” and non-capsule on “small” colonies (cap++ =

211 hypercapsulated, cap - = non-capsulated, cap + = weak capsule).

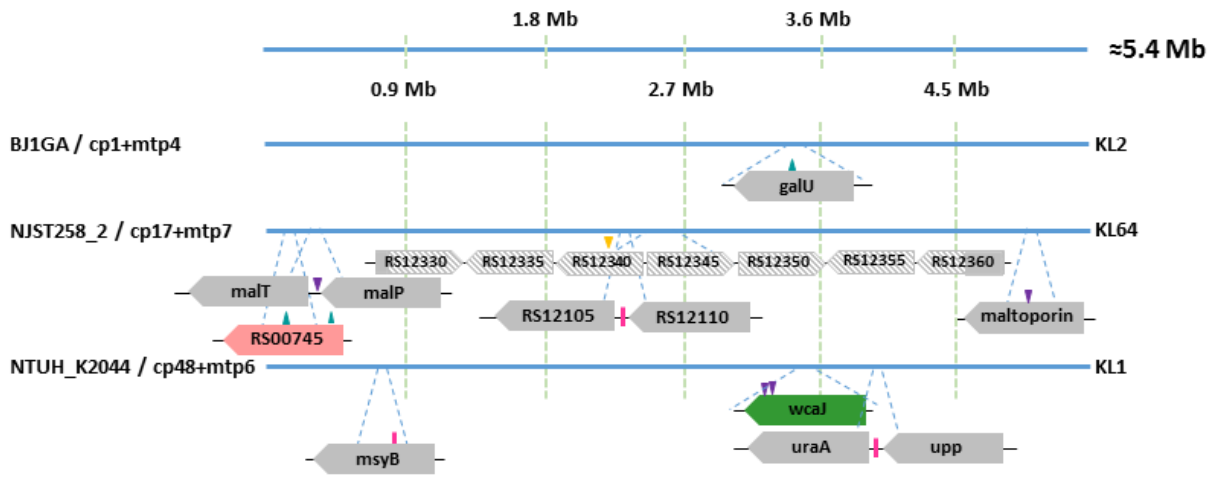

212

213 **Figure S9.** Mutations observed in populations exposed to phage cocktails that combine anti-K phages

214 and anti-K<sup>d</sup> phages mtp4, mtp6 and mtp7

215 Genes colors: green: capsule locus; pink: LPS locus; and grey: others.



216

217

218

219

220

221

222

223

224

225

226

227

228

229

230

231

232

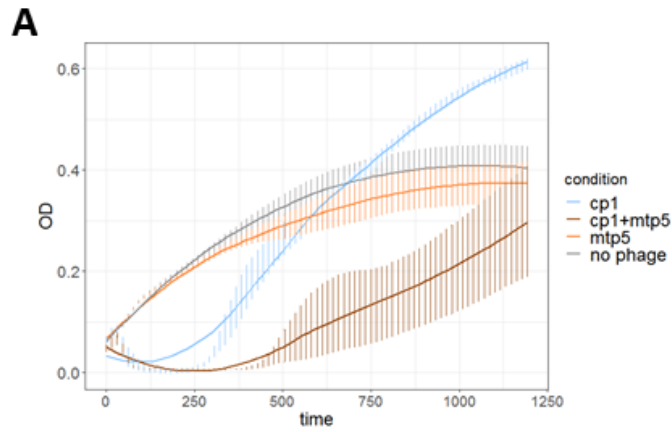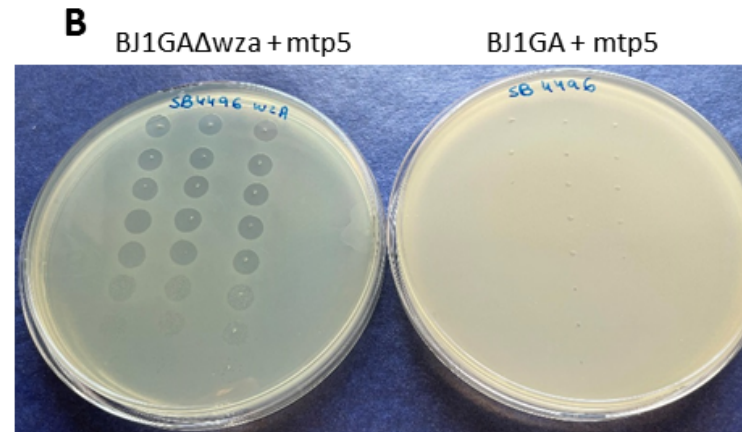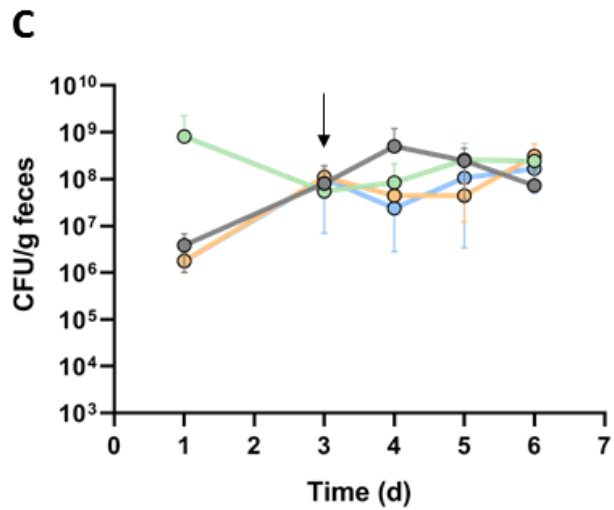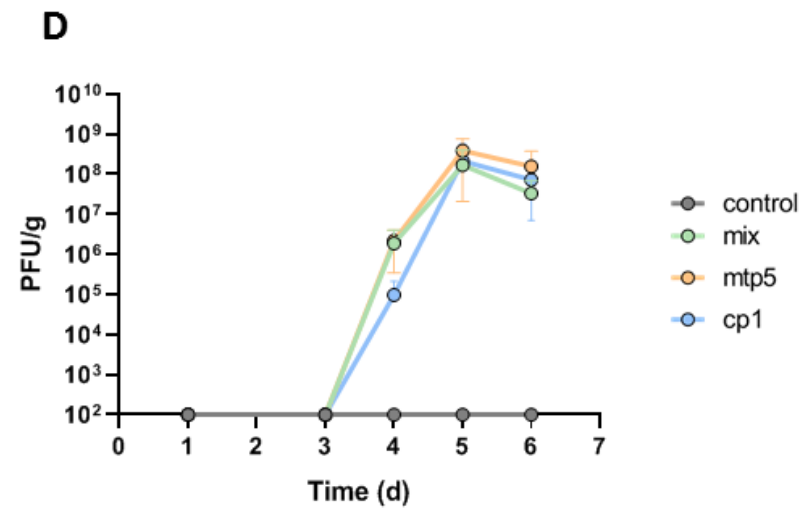

**Figure S10.** Phage mtp5 does not infect wild-type strain BJ1GA *in vitro* but infects it *in vivo*

**A:** Growth curves measured by OD600 nm reading in liquid broth for strain BJ1GA in the presence or absence of phages cp1 or mtp5. **B:** Bacterial lawns spotted with both phage types, showing that mtp5 does not infect strain SB4496 in *in vitro* solid media conditions. **C and D.** *K. pneumoniae*-colonized OMM12 mice

233 (n=13) received, only at day 3, either PBS (grey, n=4 mice), or the two phages cp1 and mtp5 together (mix; green, n=3;  $6 \times 10^7$  pfu per dose made of the same  
234 amount of each phage), or the individual phages cp1 (blue, n=3) and mtp5 (orange, n=3) by oral gavage. **C.** Levels of *K. pneumoniae* BJ1GA strain in the feces  
235 (the arrow indicates the day the phage was given to the mice). **D.** Phage titers from the fecal samples reported in panel C.

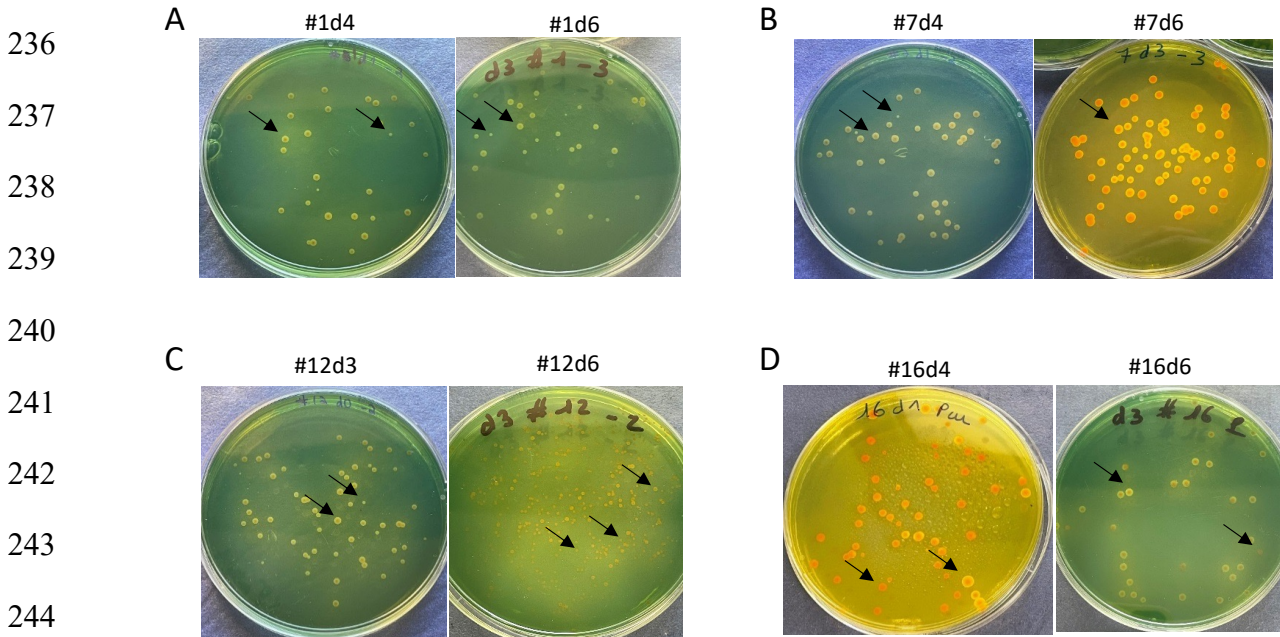

245  
246  
247  
248  
249  
250  
251  
252  
253  
254  
255  
256  
257

**E**

| control mouse #1 | cp1 |    |    | mtp5 |    |    |
|------------------|-----|----|----|------|----|----|
| phenotype        | d4  | d5 | d6 | d4   | d5 | d6 |
| small            | c2  | c4 | c6 | c2   | c4 | c6 |
| large            | c1  | c3 | c5 | c1   | c3 | c5 |

  

| mtp5 mouse #7 | cp1 |    |     | mtp5 |    |     |
|---------------|-----|----|-----|------|----|-----|
| phenotype     | d4  | d5 | d6  | d4   | d5 | d6  |
| small         | c8  |    |     | c8   |    |     |
| large         | c7  | c9 | c10 | c7   | c9 | c10 |

  

| cp1 mouse #12 | cp1 |     |     | mtp5 |     |     |
|---------------|-----|-----|-----|------|-----|-----|
| phenotype     | d4  | d5  | d6  | d4   | d5  | d6  |
| small         |     |     | c18 |      |     | c18 |
| medium        |     |     | c17 |      |     | c17 |
| medium        | c11 | c14 | c16 | c11  | c14 | c16 |
| large         | c12 | c13 | c15 | c12  | c13 | c15 |

  

| mix mouse #16 | cp1 |     |    | mtp5 |     |     |
|---------------|-----|-----|----|------|-----|-----|
| phenotype     | d4  | d5  | d6 | d4   | d5  | d6  |
| small         | c20 | c23 |    | c20  | c23 | c25 |
| medium        | c19 | c22 |    | c19  | c22 | c24 |
| large         |     | c21 |    |      | c21 |     |

  

|             |           |              |           |
|-------------|-----------|--------------|-----------|
| susceptible | resistant | intermediate | not found |
|-------------|-----------|--------------|-----------|

258 **Figure S11.** Isolation of different phenotypes from the feces of mice during phage treatment.  
 259 **A-D.** Examples of the colony phenotypes isolated from the feces of mice after *K. pneumoniae*  
 260 colonization and phage treatment. **A.** Two *K. pneumoniae* phenotypes (small and large colonies)  
 261 observed on SCAI medium agar from mouse #1 of the control group. **B.** Example of the two phenotypes

262 isolated at day 4 (first day with phage) from feces of mouse #7 treated with phage mtp5 (the small  
263 phenotype was not observed the following days, at which only the large phenotype was observed. **C.**  
264 example of the three phenotypes isolated from feces of mouse #12 treated with phage cp1 (large,  
265 medium and small colony variants). **D.** Example of two of the three phenotypes isolated from feces of  
266 mouse #16 treated with cocktail of phages cp1+mtp5. **E.** All colonies (each being represented with a  
267 number preceded by the letter 'c', corresponding to those in table S10) were tested for resistance  
268 against the two original phages, showing different susceptibility patterns. Capsule staining  
269 presence/absence results can be found in table S9.

270

271

272

273

274

275

276

277

278

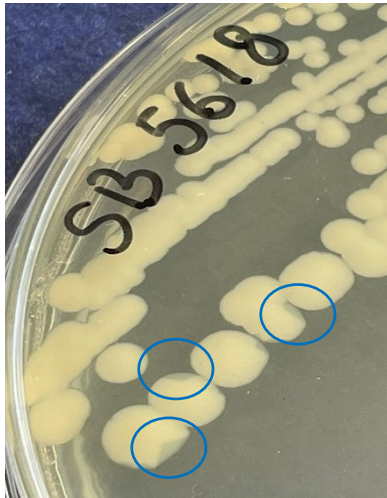

279 **Figure S12.** Example of non-mucoid sectors.

280 Capsulated (wild-type) *K. pneumoniae* strains were streaked on TSA (Tryptic Soy Agar) and incubated

281 for 24 h at 37°C. The colonies were then searched for non-mucoid sectors; three examples are depicted

282 on the plate. When none was detected, the plates were further kept at 25°C until non-mucoid sectors

283 could be observed <sup>12</sup>.

**A**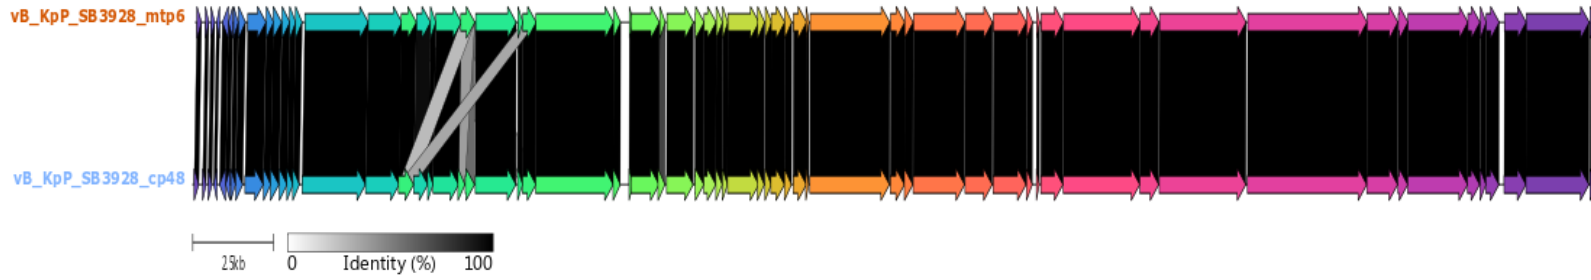**B**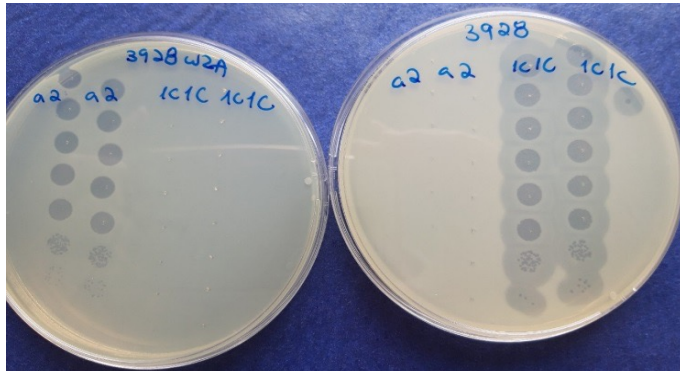**C**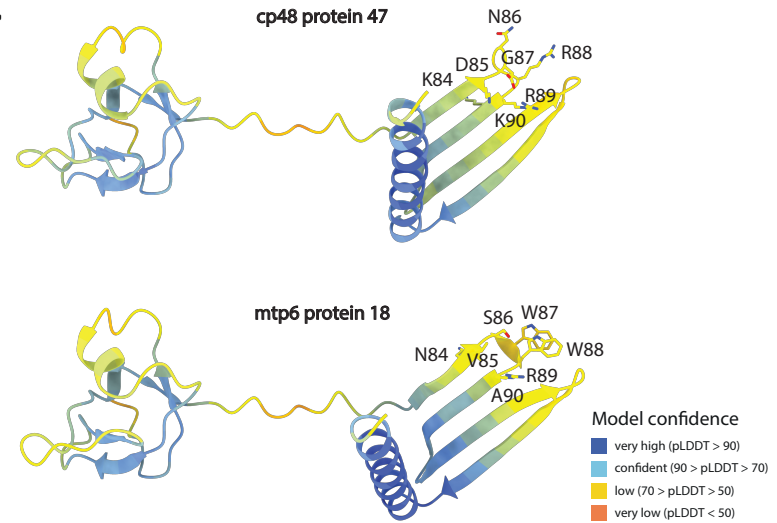

285 **Figure S13.** Comparison of phages mtp6 and cp48 for their genomic and proteic structures and infection phenotype.

286 **A.** Comparison of the genomic structure of phages mtp6 and cp48. The only differences are observed in two hypothetical proteins and in one HNH

287 endonuclease (see supplementary text 2) **B.** Differences in infection phenotypes of phages mtp6 and cp48 using strain NTUH-K2044 (SB3928): mtp6 infects

288 the non-capsulated NTUH-2044-wza mutant, and cp48 infects the wt strain. **C.** Alphafold predicted structural models of protein 47 of phage cp48 and protein

289 18 of phage mtp6, indicating the seven amino-acids that differ between the two proteins. These variants have very different physico-chemical properties and

290 are located in an exposed loop of the proteins, suggesting functional differences. Protein 47 of cp48 presents a highly positively charged loop (K84, R88, R89

291 and K90), while protein 18 of mtp6 has a bulky hydrophobic loop (W87 and W88). Predicted structural models are colored according to the Alphafold

292 confidence estimate per-residue (pLDDT).

293 **Supplementary references**

- 294 1. Deleo, F. R. *et al.* Molecular dissection of the evolution of carbapenem-resistant multilocus  
295 sequence type 258 *Klebsiella pneumoniae*. *Proc. Natl. Acad. Sci. U.S.A.* **111**, 4988–4993 (2014).
- 296 2. Rodrigues, C., Desai, S., Passet, V., Gajjar, D. & Brisse, S. Genomic evolution of the globally  
297 disseminated multidrug-resistant *Klebsiella pneumoniae* clonal group 147. *Microb Genom* **8**,  
298 (2022).
- 299 3. Dong, N. *et al.* Genome analysis of clinical multilocus sequence Type 11 *Klebsiella pneumoniae*  
300 from China. *Microb Genom* **4**, (2018).
- 301 4. Huynh, B.-T. *et al.* *Klebsiella pneumoniae* carriage in low-income countries: antimicrobial  
302 resistance, genomic diversity and risk factors. *Gut microbes* 1–13 (2020)  
303 doi:10.1080/19490976.2020.1748257.
- 304 5. Wyres, K. L. *et al.* Emergence and rapid global dissemination of CTX-M-15-associated *Klebsiella*  
305 *pneumoniae* strain ST307. *J. Antimicrob. Chemother.* **74**, 577–581 (2019).
- 306 6. Wu, K.-M. *et al.* Genome sequencing and comparative analysis of *Klebsiella pneumoniae* NTUH-  
307 K2044, a strain causing liver abscess and meningitis. *J Bacteriol* **191**, 4492–4501 (2009).
- 308 7. Lery, L. M. S. *et al.* Comparative analysis of *Klebsiella pneumoniae* genomes identifies a  
309 phospholipase D family protein as a novel virulence factor. *BMC Biol* **12**, 41 (2014).
- 310 8. Turton, J. F. *et al.* Genetically similar isolates of *Klebsiella pneumoniae* serotype K1 causing liver  
311 abscesses in three continents. *Journal of medical microbiology* **56**, 593–7 (2007).
- 312 9. Merlet, A. *et al.* Primary liver abscess due to CC23-K1 virulent clone of *Klebsiella pneumoniae* in  
313 France. *Clinical microbiology and infection : the official publication of the European Society of*  
314 *Clinical Microbiology and Infectious Diseases* **18**, E338-9 (2012).
- 315 10. de Sousa, J. A. M., Buffet, A., Haudiquet, M., Rocha, E. P. C. & Rendueles, O. Modular prophage  
316 interactions driven by capsule serotype select for capsule loss under phage predation. *ISME J* **14**,  
317 2980–2996 (2020).



- 318 11. Kala, S. *et al.* HNH proteins are a widespread component of phage DNA packaging machines. *Proc*  
319 *Natl Acad Sci U S A* **111**, 6022–6027 (2014).
- 320 12. Chiarelli, A. *et al.* Diversity of mucoid to non-mucoid switch among carbapenemase-producing  
321 *Klebsiella pneumoniae*. *BMC Microbiol* **20**, 325 (2020).
- 322
